# Supplementary material for: Influence of Thyroid-stimulating Hormone Suppression Therapy on Bone Mineral Density in Patients with Differentiated Thyroid Cancer: A Meta-analysis
Source: PubMed Central journal article supplement — J Bone Metab. 2019 Feb 28;26(1):51–60. doi: 10.11005/jbm.2019.26.1.51 (PMC6416150; doi:10.11005/jbm.2019.26.1.51), 2019-02-28
Supplement: jbm-26-51-s001.pdf [file jbm-26-51-s001.pdf]

## SUPPLEMENTARY MATERIAL

**Supplementary Appendix 1.** The search strategy that details the searching process of relevant clinical study selection

## Queries

1. Population: patient who has thyroid cancer
2. Intervention and control: none
3. Outcome: osteoporosis
4. Study type: none

## PubMed (September 26, 2018)

| Queries                                                                                                                                                                                                                                                                                                                                                                                                                                                                                                  | Search result |
|----------------------------------------------------------------------------------------------------------------------------------------------------------------------------------------------------------------------------------------------------------------------------------------------------------------------------------------------------------------------------------------------------------------------------------------------------------------------------------------------------------|---------------|
| ("thyroid neoplasms"[MeSH Terms] OR "Thyroidectomy"[MeSH Terms] OR ("thyroid"[All Fields] AND "neoplasms"[All Fields]) OR "thyroid neoplasms"[All Fields] OR ("thyroid"[All Fields] AND "cancer"[All Fields]) OR "thyroid cancer"[All Fields] OR "thyroidectomy"[All Fields]) AND ("osteoporosis, postmenopausal"[MeSH Terms] OR ("osteoporosis"[All Fields] AND "postmenopausal"[All Fields]) OR "postmenopausal osteoporosis"[All Fields] OR "osteoporosis"[All Fields] OR "osteoporosis"[MeSH Terms]) | 309           |

## Search Details

## Query Translation:

```
("thyroid neoplasms"[MeSH Terms] OR "Thyroidectomy"[Mesh] OR ("thyroid"[All Fields] AND "neoplasms"[All Fields]) OR "thyroid neoplasms"[All Fields] OR ("thyroid"[All Fields] AND "cancer"[All Fields]) OR "thyroid cancer"[All Fields] OR "thyroidectomy"[All Fields]) AND ("osteoporosis, postmenopausal"[MeSH Terms] OR ("osteoporosis"[All Fields] AND "postmenopausal"[All Fields]) OR "postmenopausal osteoporosis"[All Fields] OR "osteoporosis"[All Fields] OR "osteoporosis"[MeSH Terms])
```

 

## Result:

309

## Database:

PubMed

## User query:

```
("thyroid neoplasms"[MeSH Terms] OR "Thyroidectomy"[Mesh] OR ("thyroid"[All Fields] AND "neoplasms"[All Fields]) OR "thyroid neoplasms"[All Fields] OR ("thyroid"[All Fields] AND "cancer"[All Fields]) OR "thyroid cancer"[All Fields] OR "thyroidectomy"[All Fields]) AND ("osteoporosis, postmenopausal"[MeSH Terms] OR ("osteoporosis"[All Fields] AND "postmenopausal"[All Fields]) OR "postmenopausal osteoporosis"[All Fields] OR "osteoporosis"[All Fields] OR "osteoporosis"[MeSH Terms])
```

## EMBASE (September 26, 2018)

| Queries                                                                                                                                                                                                                                                                                                   | Search result |
|-----------------------------------------------------------------------------------------------------------------------------------------------------------------------------------------------------------------------------------------------------------------------------------------------------------|---------------|
| ('thyroid cancer'/exp OR 'thyroid tumor'/exp OR 'thyroidectomy'/exp OR 'thyroid neoplasm' OR 'thyroid tumor' OR 'thyroidectomy' OR 'thyroidectomy') AND ('osteoporosis'/exp OR 'bone density'/exp OR 'bone density'/exp OR 'fragility fracture'/exp OR 'bone mineral density' OR 'osteoporotic fracture') | 739           |

**Results** 언어 선택 ▼

{thyroid cancer/exp OR thyroid tumor/exp OR thyroidectomy/exp OR thyroid neoplasm/ OR thyroidectomy} AND {osteoporosis/exp OR bone density/exp OR fragility fracture/exp OR bone mineral density/ OR osteoporotic fracture}

Search > Mapping > Date > Sources > Fields > Quick limits > EBM > Pub. types > Languages > Gender > Age > Animal > Search tips >

**Results Filters** History Save | Delete | Print view | Export | Email Combine > using  And  Or Collapse

+ Expand - Collapse all Apply >

Sources > **739 results for search #1** Set email alert Set RSS feed Search details Index miner

Drugs >

Diseases >

Devices >

Floating Subheadings >

Age >

Gender >

**#1** ('thyroid cancer'/exp OR 'thyroid tumor'/exp OR 'thyroidectomy'/exp OR 'thyroid neoplasm' OR 'thyroidectomy') AND ('osteoporosis'/exp OR 'bone density'/exp OR 'fragility fracture'/exp OR 'bone mineral density' OR 'osteoporotic fracture') 739

**Results** View | Print | Export | Email | Order | Add to Clipboard 1 - 25

Select number of items: Selected: 0 (clear) Show all abstracts | Sort by:  Relevance  Publication Year  Entry Date

**1** All 25-hydroxyvitamin D-deficient Indian postmenopausal women do not have secondary hyperparathyroidism  
Dixit V., Tripathi R.L., Dhameal D.K.  
Archives of Osteoporosis 2018 13:1 Article Number 62 Cited by: 0  
Embase Abstract Index Terms View Full Text Similar records >

### Cochrane Library (September 26, 2018)

|     | Queries                                                                      | Search result    |
|-----|------------------------------------------------------------------------------|------------------|
| #1  | MeSH descriptor: [Thyroid Neoplasms] explode all trees                       | 547              |
| #2  | MeSH descriptor: [Thyroidectomy] explode all trees                           | 512              |
| #3  | 'thyroid cancer' or 'thyroid neoplasm' or 'thyroid tumor' or 'thyroidectomy' | 2,386            |
| #4  | #1 OR #2 OR #3                                                               | 2,474            |
| #5  | MeSH descriptor: [Osteoporosis] explode all trees                            | 3,686            |
| #6  | MeSH descriptor: [Osteoporotic Fractures] explode all trees                  | 236              |
| #7  | MeSH descriptor: [Bone Density] explode all trees                            | 4,374            |
| #8  | 'osteoporotic fracture' or 'osteoporosis' or 'bone mineral density'          | 11,813           |
| #9  | #5 OR #6 OR #7 OR #8                                                         | 12,378           |
| #10 | #4 AND #9                                                                    | 60 <sup>a)</sup> |

<sup>a)</sup>24 reviews, 8 protocols, and 28 trials.

|   |   |     |                                                                              |        |       |
|---|---|-----|------------------------------------------------------------------------------|--------|-------|
| - | + | #1  | MeSH descriptor: [Thyroid Neoplasms] explode all trees                       | MeSH ▼ | 547   |
| - | + | #2  | MeSH descriptor: [Thyroidectomy] explode all trees                           | MeSH ▼ | 512   |
| - | + | #3  | 'thyroid cancer' or 'thyroid neoplasm' or 'thyroid tumor' or 'thyroidectomy' | ▼      | 2386  |
| - | + | #4  | #1 OR #2 OR #3                                                               | ▼      | 2474  |
| - | + | #5  | MeSH descriptor: [Osteoporosis] explode all trees                            | MeSH ▼ | 3686  |
| - | + | #6  | MeSH descriptor: [Osteoporotic Fractures] explode all trees                  | MeSH ▼ | 236   |
| - | + | #7  | MeSH descriptor: [Bone Density] explode all trees                            | MeSH ▼ | 4374  |
| - | + | #8  | 'osteoporotic fracture' or 'osteoporosis' or 'bone mineral density'          | ▼      | 11813 |
| - | + | #9  | #5 OR #6 OR #7 OR #8                                                         | ▼      | 12378 |
| - | + | #10 | #4 AND #9                                                                    | ▼      | 60    |

|  |                        |                         |              |                 |                          |                       |               |
|--|------------------------|-------------------------|--------------|-----------------|--------------------------|-----------------------|---------------|
|  | Cochrane Reviews<br>24 | Cochrane Protocols<br>8 | Trials<br>28 | Editorials<br>0 | Special collections<br>0 | Clinical Answers<br>0 | Other Reviews |
|--|------------------------|-------------------------|--------------|-----------------|--------------------------|-----------------------|---------------|

**28 Trials matching on ""#10 - #4 AND #9""**

**Cochrane Central Register of Controlled Trials**  
Issue 9 of 12, September 2018

**Select all (28)**    Export selected citation(s)

Order by Relevancy    Results per page 25

- Lack of deleterious effect on bone mineral density of long-term thyroxine suppressive therapy for differentiated thyroid carcinoma**  
JL Reverter, S Holgado, N Alonso, I Salinas, ML Granada, A Sanmartí  
 Endocrine-related cancer, **2005**, 12(4), 973-981 | added to CENTRAL: 31 July 2006 | 2006 Issue 3  
[PubMed](#)
- Prevention of bone loss induced by thyroxine suppressive therapy in postmenopausal women: the effect of calcium and calcitonin**  
AW Kung, SS Yeung  
 Journal of clinical endocrinology and metabolism, **1996**, 81(3), 1232-1236 | added to CENTRAL: 31 January 1998 | 1998 Issue 1  
[PubMed](#) | [Embase](#)
- Effect of postoperative thyrotropin suppressive therapy on bone mineral density in patients with papillary thyroid carcinoma: a prospective controlled study**  
I Sugitani, Y Fujimoto  
 Surgery, **2011**, 150(6), 1250-1257 | added to CENTRAL: 18 April 2012 | 2012 Issue 4  
[PubMed](#)

**Filter your results**

**Year** ⓘ

**Year first published**

2018 ..... 1

2017 ..... 1

2016 ..... 2

2015 ..... 3

2014 ..... 1

**Custom Range:**

yyyy to yyyy

Apply Clear

**Date** ⓘ

**Date added to CENTRAL trials database**

The last 3 months ..... 0

The last 6 months ..... 6

The last 9 months ..... 6

The last year ..... 6

The last 2 years ..... 8
