# Supplementary material for: Influence of Thyroid-stimulating Hormone Suppression Therapy on Bone Mineral Density in Patients with Differentiated Thyroid Cancer: A Meta-analysis
Source: PubMed Central journal article supplement — J Bone Metab. 2019 Feb 28;26(1):51–60. doi: 10.11005/jbm.2019.26.1.51 (PMC6416150; doi:10.11005/jbm.2019.26.1.51), 2019-02-28
Supplement: jbm-26-51-s002.pdf [file jbm-26-51-s002.pdf]

**Supplementary Table 1.** The quality assessment of each study according to the Newcastle-Ottawa Scales

| References           | Selection | Comparability | Exposure/<br>Outcome | Total |
|----------------------|-----------|---------------|----------------------|-------|
| Franklyn et al.[11]  | 3         | 1             | 2                    | 6     |
| Kung et al.[43]      | 3         | 1             | 2                    | 6     |
| Giannini et al.[46]  | 3         | 1             | 2                    | 6     |
| Hawkins et al.[44]   | 2         | 1             | 2                    | 5     |
| Goerres et al.[45]   | 2         | 1             | 2                    | 5     |
| Toivonen et al.[39]  | 3         | 1             | 2                    | 6     |
| Reverter et al.[40]  | 3         | 1             | 2                    | 6     |
| Eftekhari et al.[47] | 3         | 1             | 2                    | 6     |
| Reverter et al.[41]  | 3         | 1             | 2                    | 6     |
| Tournis et al.[38]   | 3         | 1             | 2                    | 6     |
| Moon et al.[42]      | 3         | 1             | 2                    | 6     |
